# Supplementary material for: Oral intake of Streptococcus thermophilus improves knee osteoarthritis degeneration: A randomized, double-blind, placebo-controlled clinical study
Source: PubMed Central journal article supplement — Heliyon. 2020 Apr 25;6(4):e03757. doi: 10.1016/j.heliyon.2020.e03757 (PMC7184258; doi:10.1016/j.heliyon.2020.e03757), 2020-04-25
Supplement: mmc1.pdf [file mmc1.pdf]

## Supplementary materials

### **Oral intake of *Streptococcus thermophilus* improves knee osteoarthritis degeneration: a randomized, double-blind, placebo-controlled clinical study**

Jia-Ling Lyu<sup>1,2</sup>, Ting-Ming Wang<sup>3,4</sup>, Yen-Hao Chen<sup>5</sup>, Shu-Ting Chang<sup>1</sup>, Ming-Shiang Wu<sup>6,7</sup>, Yung-Hao Lin<sup>8</sup>, Yung-Hsiang Lin<sup>1</sup>  
Chen-Meng Kuan<sup>1\*</sup>

<sup>1</sup>Research & Design Center, TCI CO., Ltd., 114 Taipei, Taiwan.

<sup>2</sup>Department of Cosmeceutics, China Medical University, Taichung 404, Taiwan.

<sup>3</sup>Department of Orthopaedic Surgery, School of Medicine, National Taiwan University, Taipei 100, Taiwan.

<sup>4</sup>Department of Orthopaedic Surgery, National Taiwan University Hospital, Taipei 100, Taiwan.

<sup>5</sup>Research & Design Center, TCI Gene Inc., Taipei 114, Taiwan.

<sup>6</sup>Departments of Internal Medicine, School of Medicine, National Taiwan University, Taipei 100, Taiwan.

<sup>7</sup>Departments of Internal Medicine, National Taiwan University Hospital, Taipei 100, Taiwan.

<sup>8</sup>Global Business Center, TCI CO., Ltd., Taipei 114, Taiwan

\*Correspondence: [Chenmeng.Kuan@tci-bio.com](mailto:Chenmeng.Kuan@tci-bio.com)

**Table S1. Degree of improvement (based on KL grades 2, 3) ( *n* = 10 for placebo group, *n* = 25 for TCI633 group)**

| Biomarker | Group   | Week 4                       |                                             | Week 8                          |                                             | Week 12                          |                                             | <i>p</i> value                                                     |
|-----------|---------|------------------------------|---------------------------------------------|---------------------------------|---------------------------------------------|----------------------------------|---------------------------------------------|--------------------------------------------------------------------|
|           |         | I4-I0 (%)<br>Difference (SE) | Improvement rate<br>(%)<br>(improved/total) | I8-I0<br>Difference<br>(%) (SE) | Improvement rate<br>(%)<br>(improved/total) | I12-I0<br>Difference<br>(%) (SE) | Improvement rate<br>(%)<br>(improved/total) |                                                                    |
| sCTXII    | Placebo | -6.50 ± 2.30                 | 50% (5/10)                                  | -15.80 ± 2.58                   | 50% (5/10)                                  | -37.07 ± 6.01                    | 40% (4/10)                                  | 0.047 <sup>a</sup> , 0.019 <sup>b</sup> , < 0.001 <sup>c</sup>     |
|           | TCI633  | -20.41 ± 5.52                | 44% (11/25)                                 | -22.12 ± 6.66                   | 44% (11/25)                                 | -44.22 ± 3.90                    | 44% (11/25)                                 | 0.004 <sup>a</sup> , 0.008 <sup>b</sup> , < 0.001 <sup>c</sup>     |
| sCRP      | Placebo | -42.95 ± 10.03               | 40% (4/10)                                  | -45.50 ± 8.35                   | 50% (5/10)                                  | -46.63 ± 4.49                    | 50% (5/10)                                  | 0.025 <sup>a</sup> , 0.021 <sup>b</sup> , 0.003 <sup>c</sup>       |
|           | TCI633  | -45.24 ± 6.13                | 60% (15/25)                                 | -40.30 ± 8.24                   | 60% (15/25)                                 | -44.35 ± 7.72                    | 52% (13/25)                                 | < 0.001 <sup>a</sup> , < 0.001 <sup>b</sup> , < 0.001 <sup>c</sup> |

I4-I0 difference: the different between week 0 and week 4. I8-I0 difference: the different between week 0 and week 8. I12-I0 difference: the different between week 0 and week 12. a: comparison between week 0 and week 4. b: comparison between week 0 and week 8. c: comparison between week 0 and week 12.
